# Supplementary material for: Novel Hybrid Benzoazacrown Ligand as a Chelator for Copper and Lead Cations: What Difference Does Pyridine Make
Source: MDPI journal article supplement (doi:10.3390/molecules27103115), 2022-05-12
Supplement: s1 [file s1]

## Electronic Supplementary Information for

### Novel hybrid benzoazacrown ligand as chelator for Lead and Copper cations: what the difference a pyridine makes

by B.V. Egorova, L.S. Zamurueva, A.D. Zubenko, A.V. Pashanova, A.A. Mitrofanov, A.B. Priselkova, Yu.V. Fedorov, A.L. Trigub, O.A. Fedorova and S.N. Kalmykov

#### Content

|                                                                                       |    |
|---------------------------------------------------------------------------------------|----|
| NMR and MS characterization of ligand, intermediate products and considered complexes | 1  |
| Potentiometric titration curves                                                       | 14 |
| pH distribution diagrams of cations' species in presence of ligand and acetate        | 14 |
| HPLC chromatograms                                                                    | 15 |

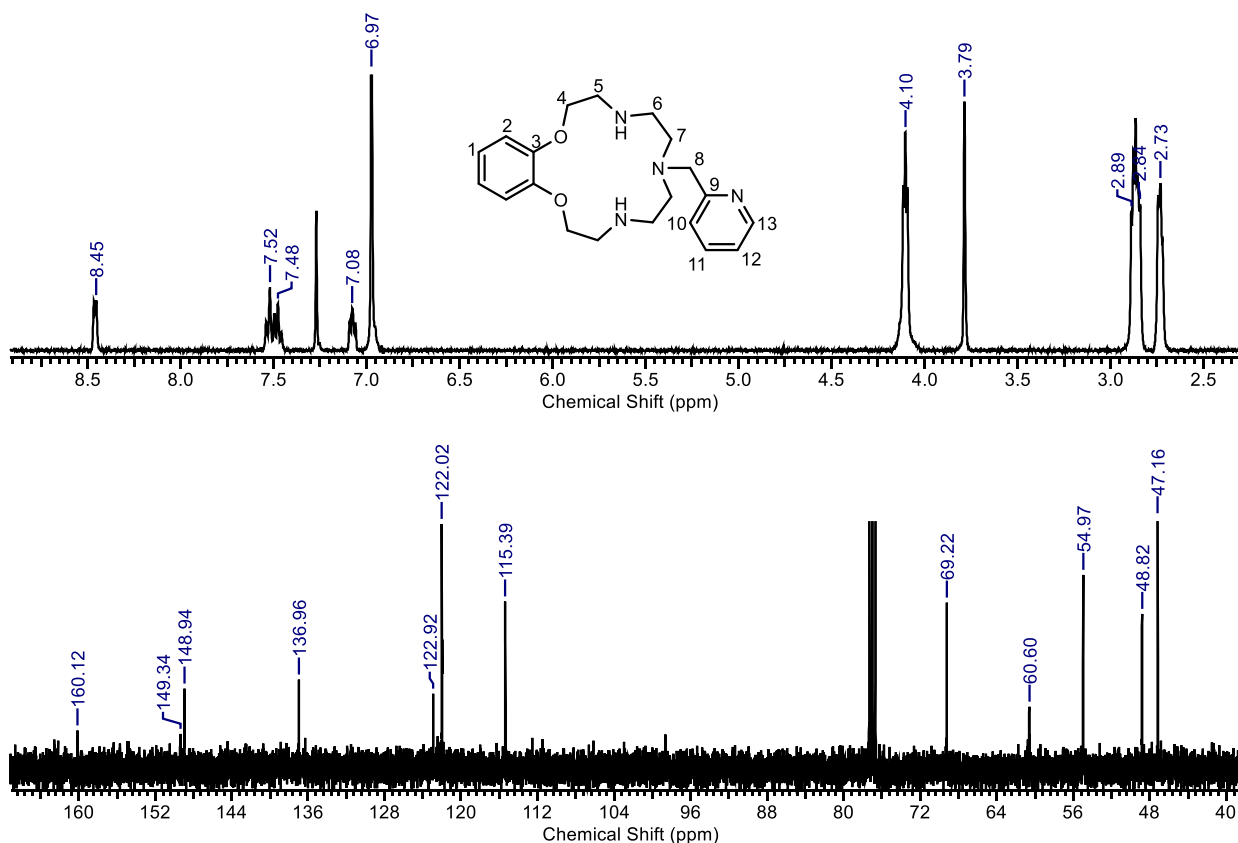

Figure S1.  $^1\text{H}$  and  $^{13}\text{C}$  NMR spectra of **3** in  $\text{CDCl}_3$ .

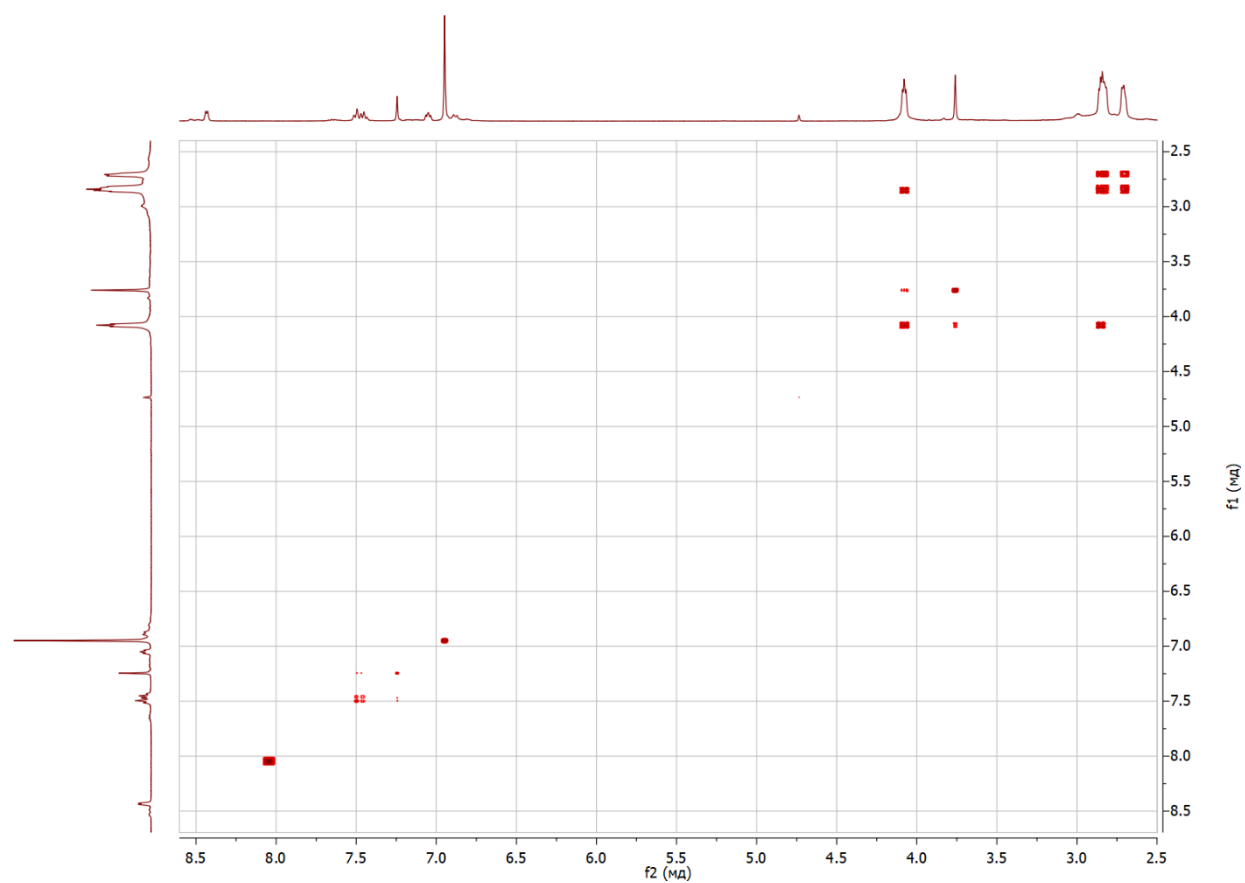

Figure S2. COSY spectrum of **3** in CDCl<sub>3</sub>.

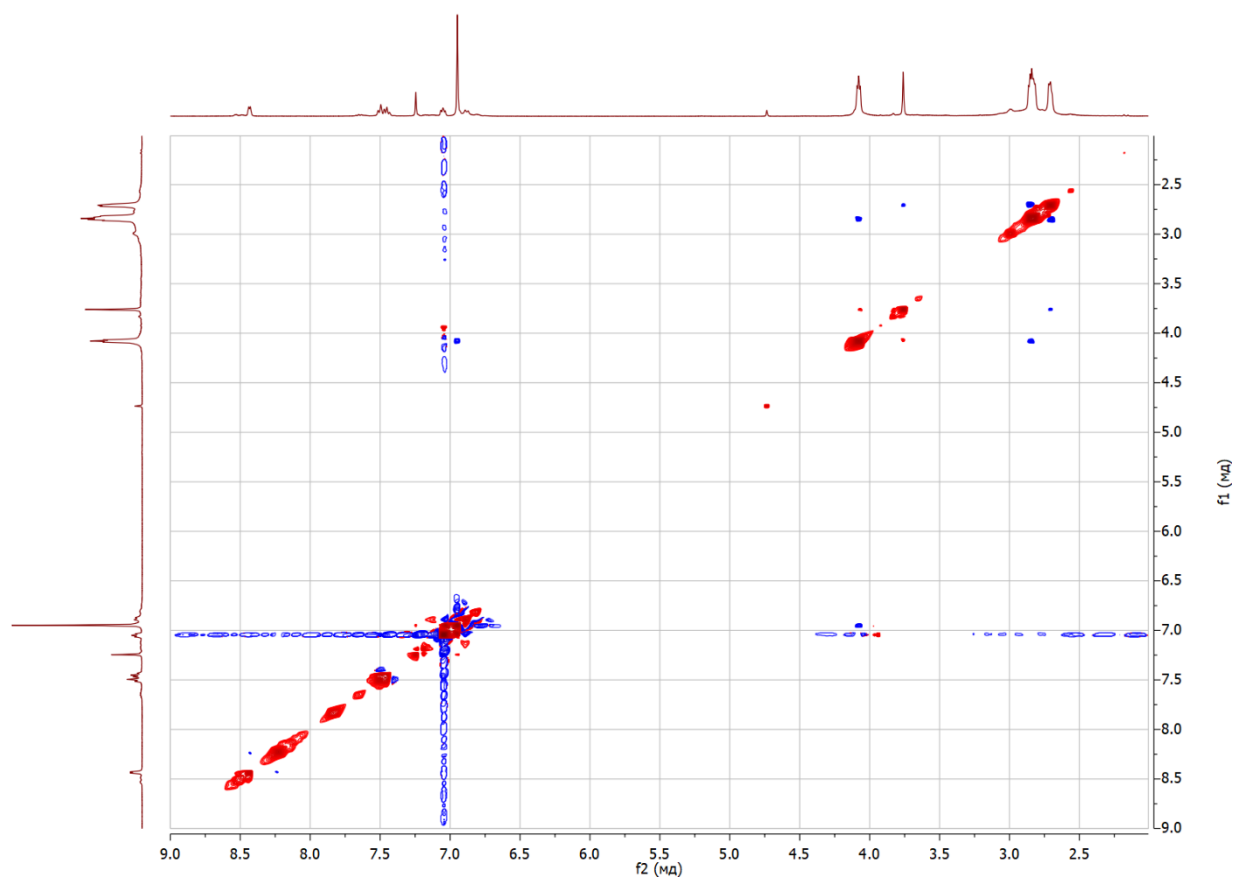

Figure S3. NOESY spectrum of **3** in CDCl<sub>3</sub>.

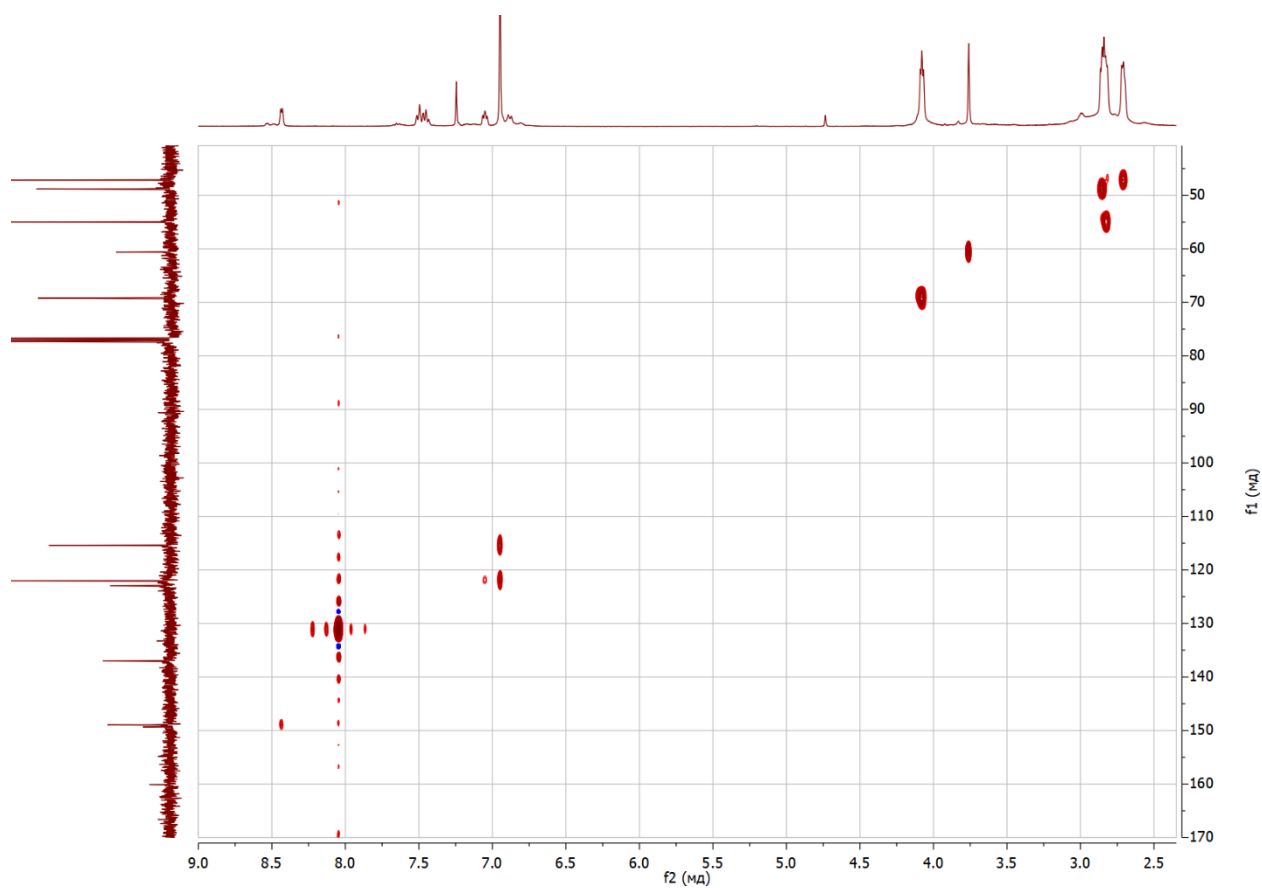

Figure S4. HSQC spectrum of **3** in  $\text{CDCl}_3$ .

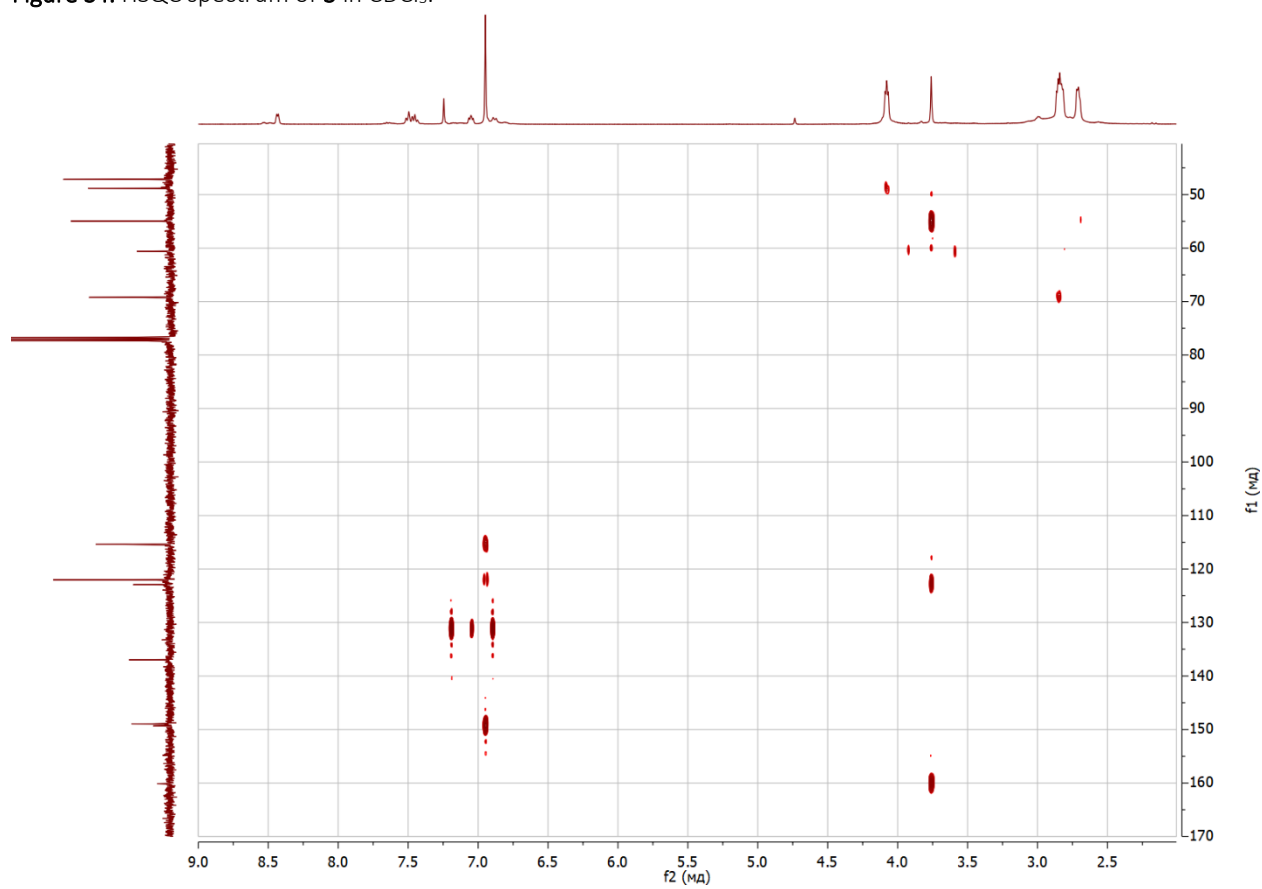

Figure S5. HMBC spectrum of **3** in  $\text{CDCl}_3$ .

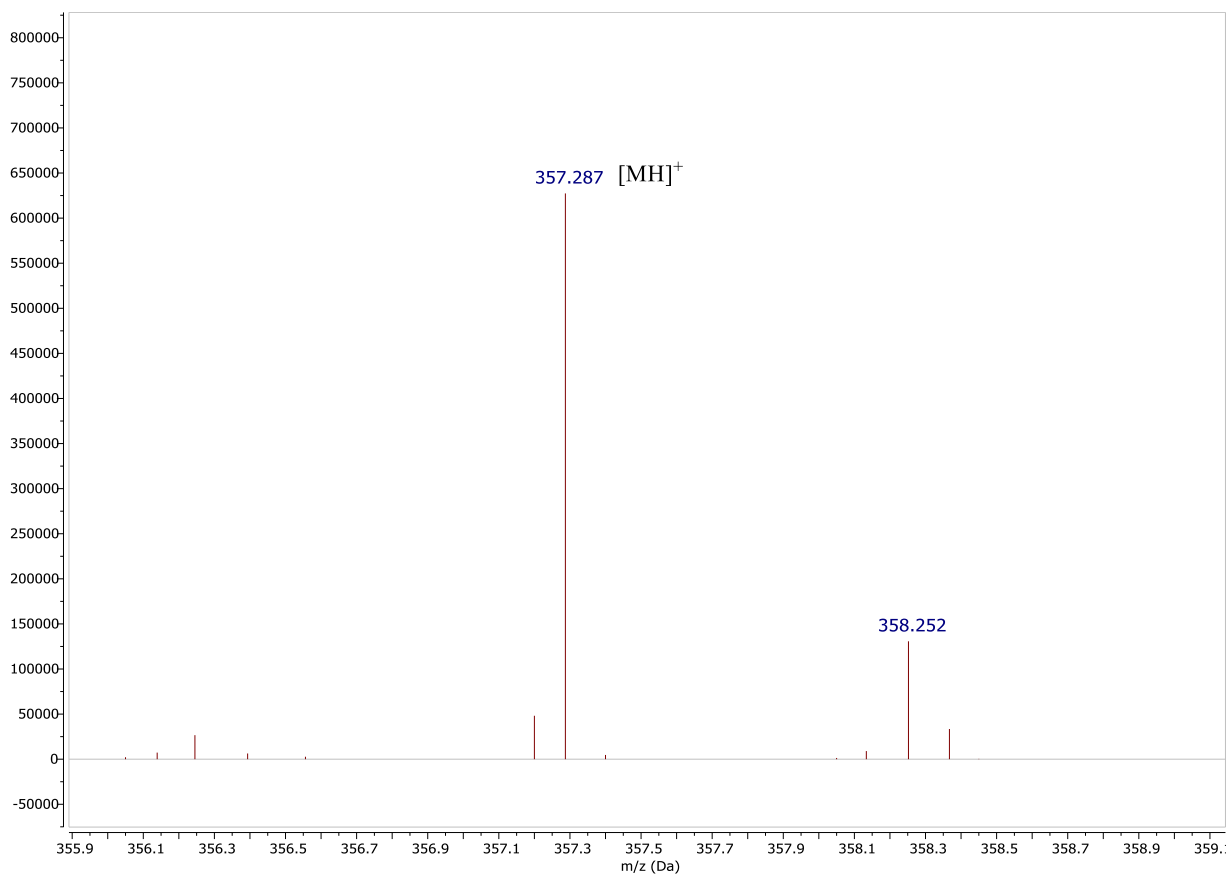

Figure S6. MS (ESI) spectrum of **3**.

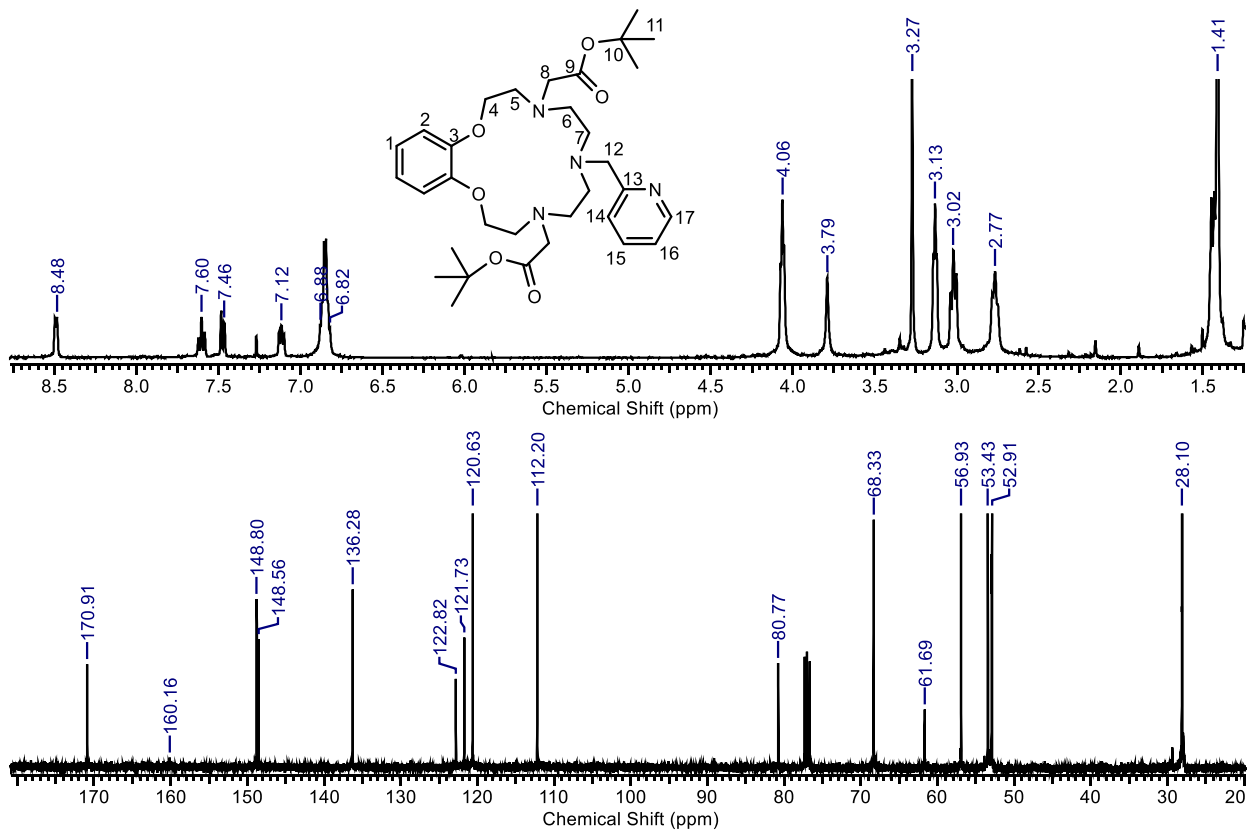

Figure S7.  $^1H$  and  $^{13}C$  NMR spectra of **4** in  $CDCl_3$ .

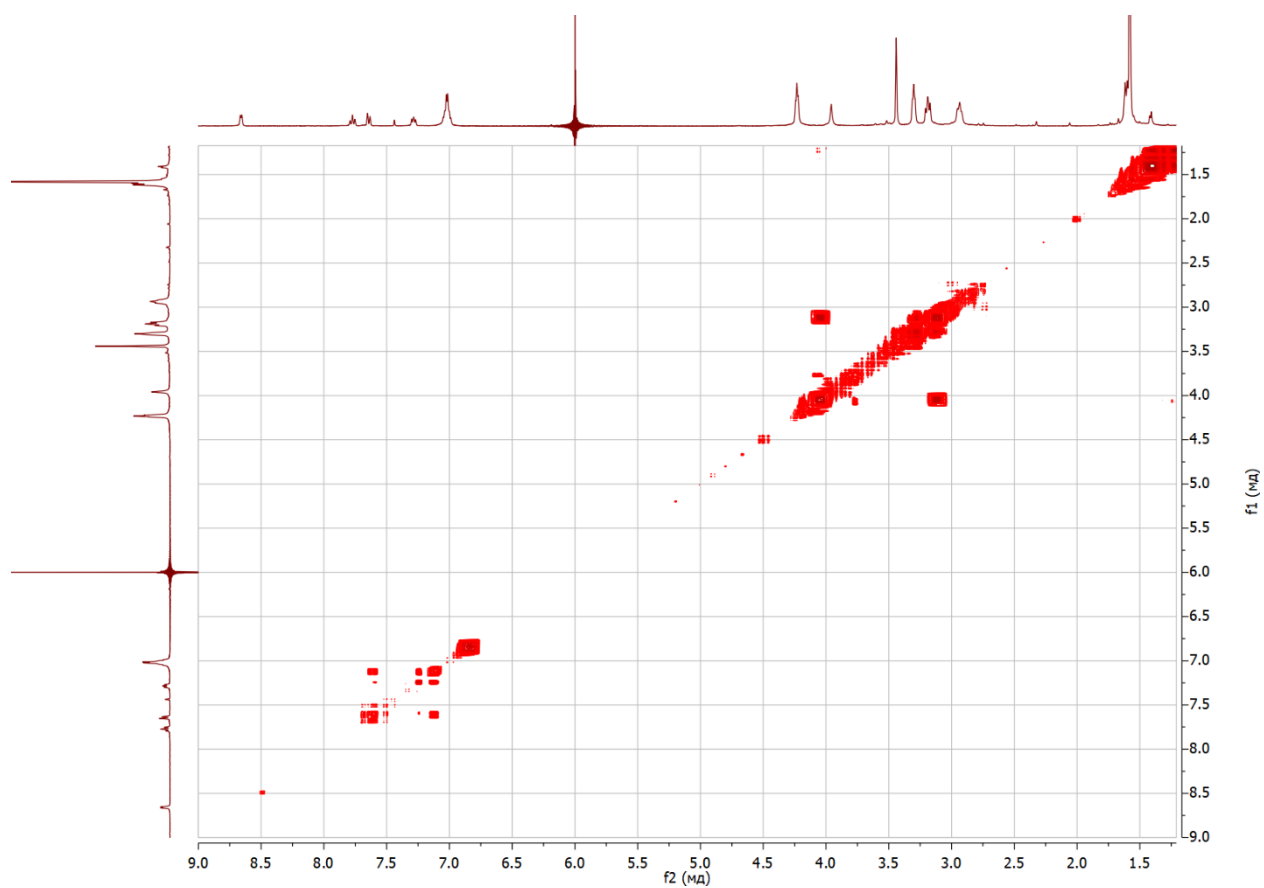

Figure S8. COSY spectrum of **4** in CDCl<sub>3</sub>.

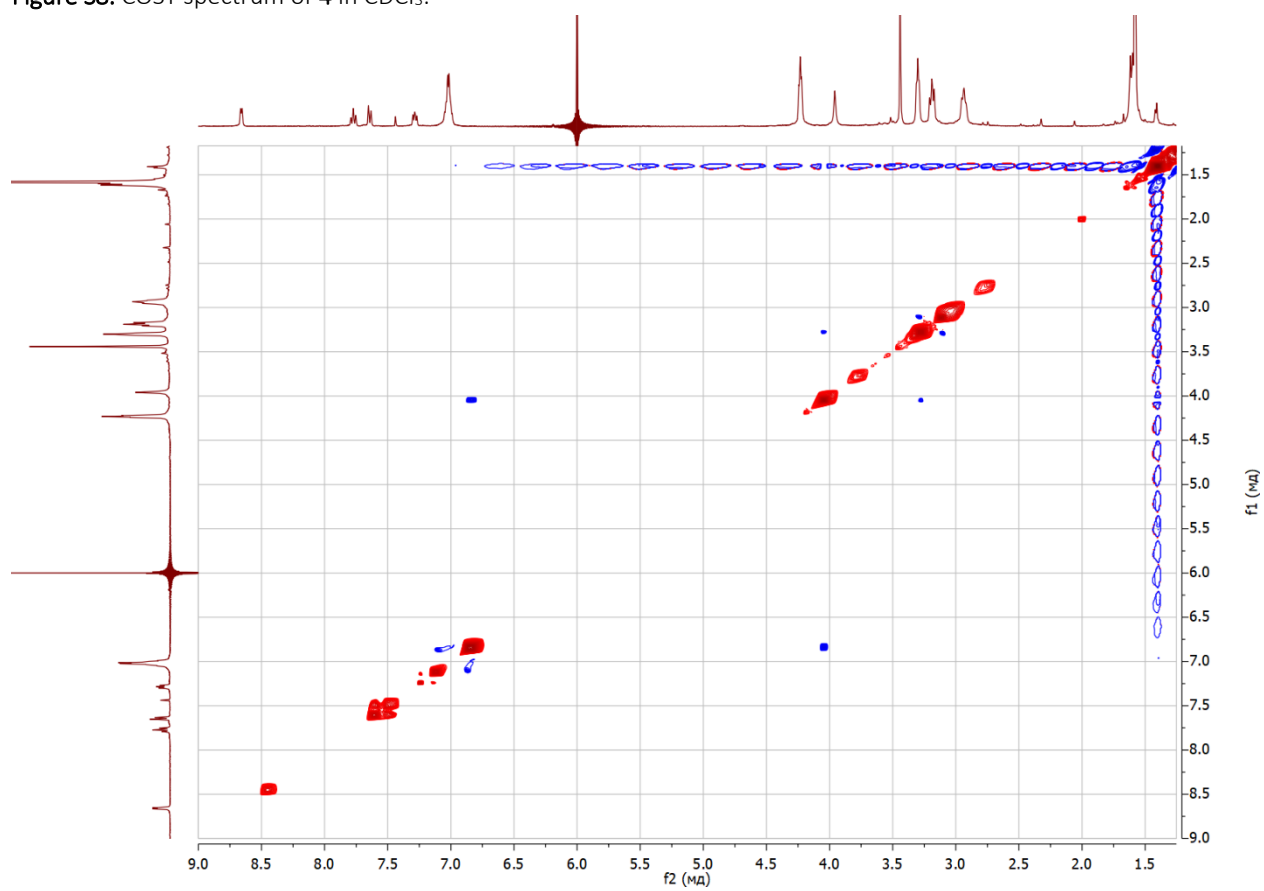

Figure S9. NOESY spectrum of **4** in CDCl<sub>3</sub>.

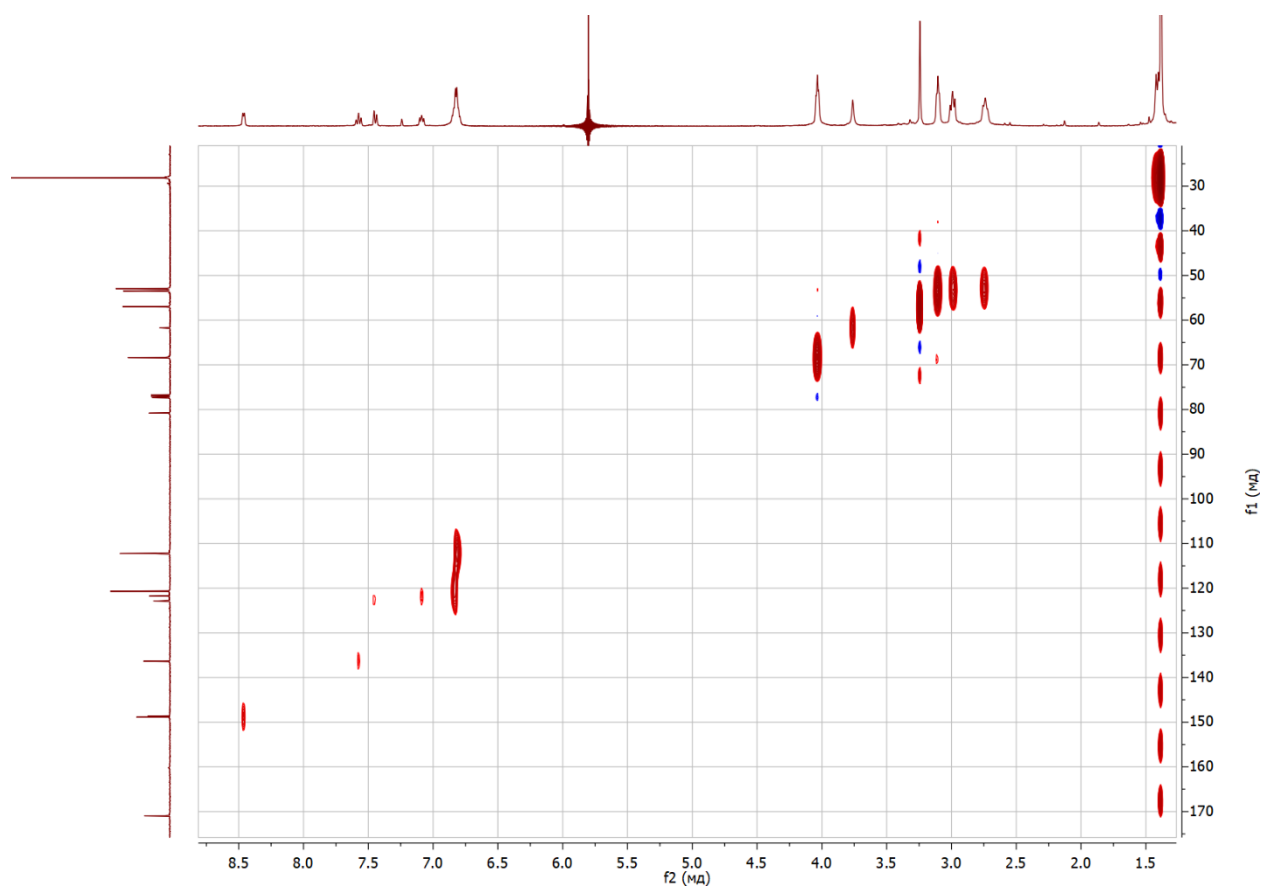

Figure S10. HSQC spectrum of **4** in  $\text{CDCl}_3$ .

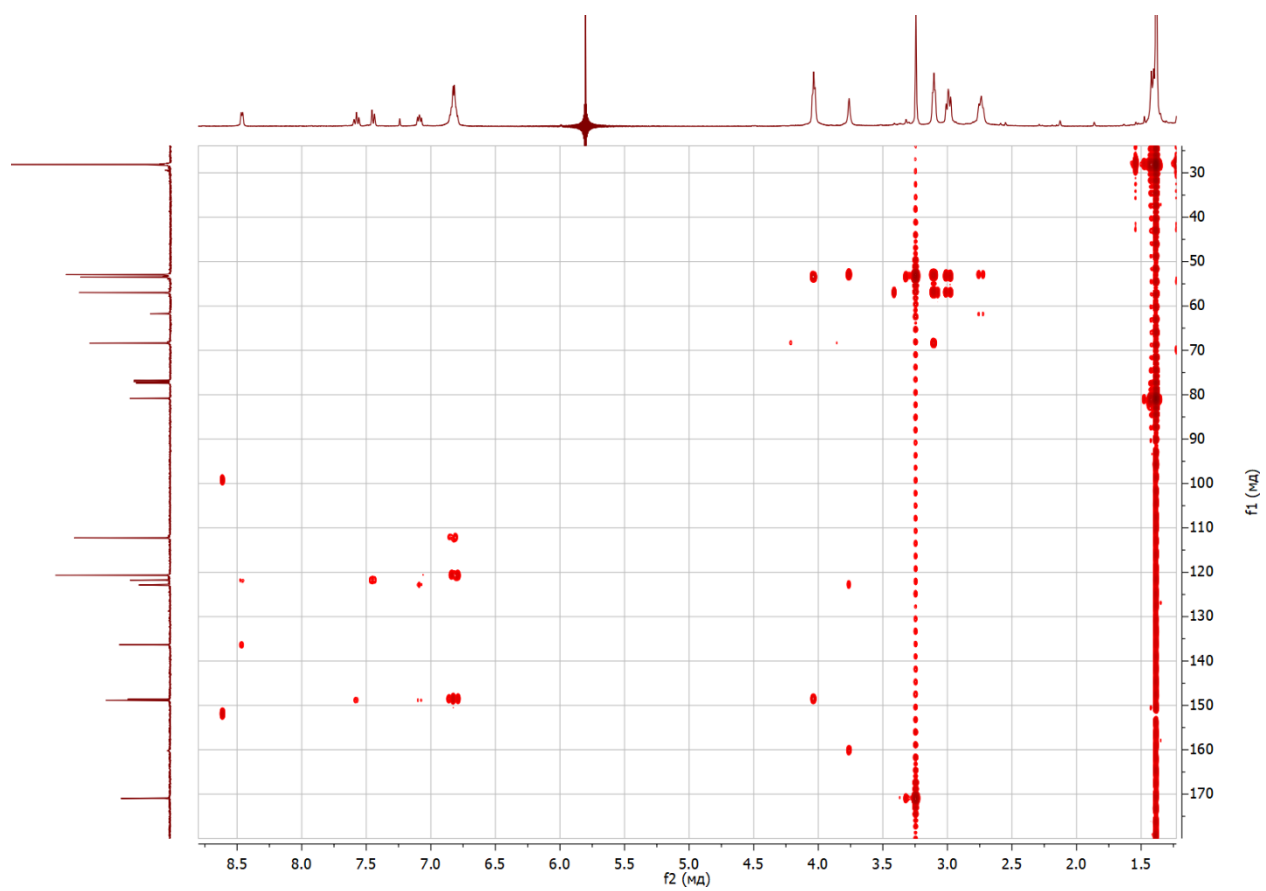

Figure S11. HMBC spectrum of **4** in  $\text{CDCl}_3$ .

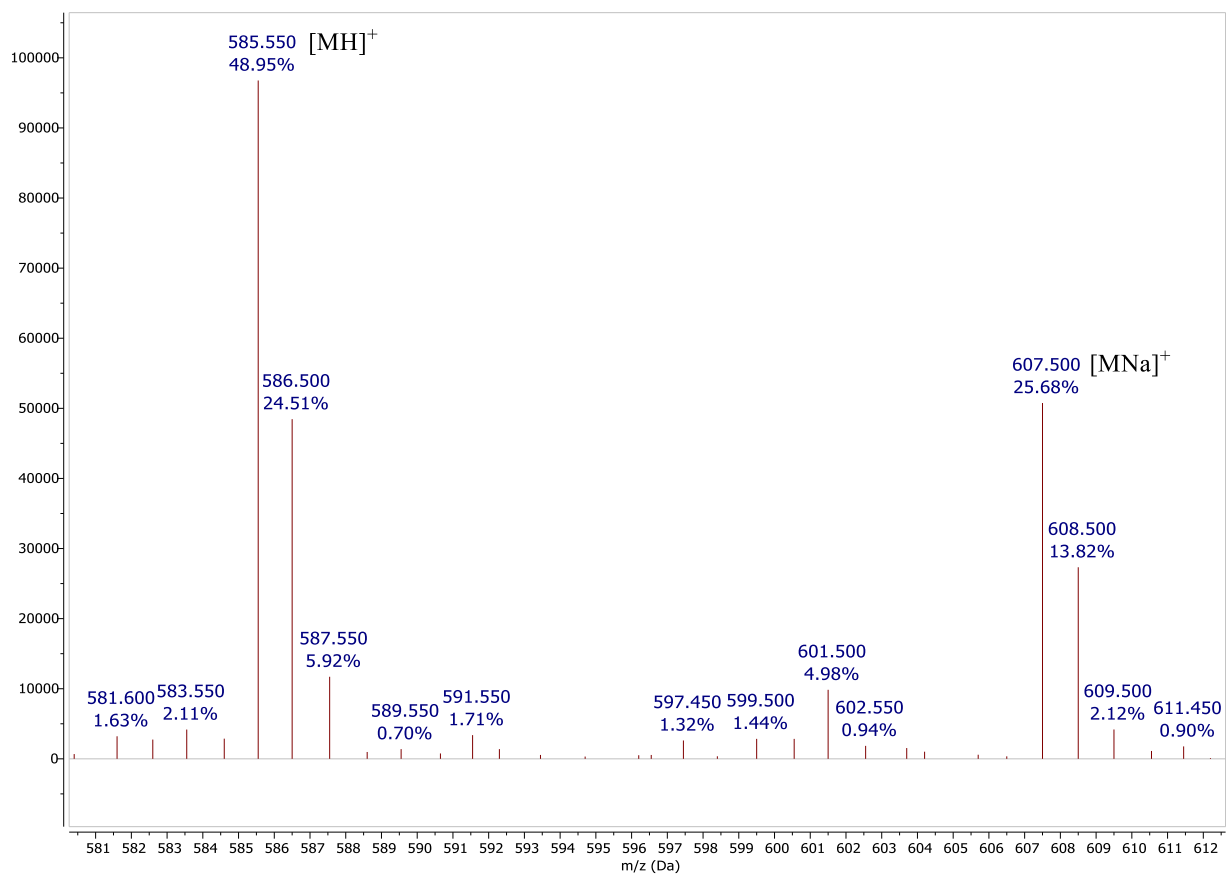

Figure S12. MS (ESI) spectrum of **4**.

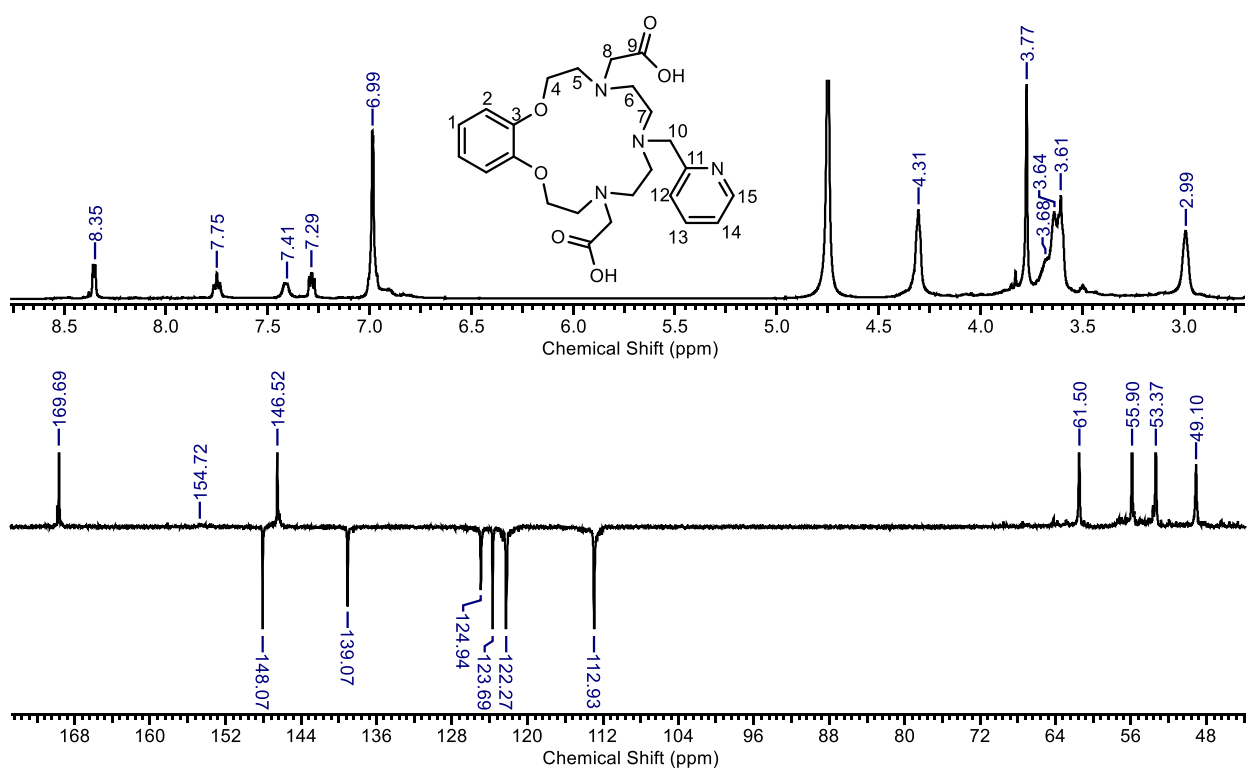

Figure S13. <sup>1</sup>H and <sup>13</sup>C NMR spectra of **H<sub>2</sub>BA2A1Py** in D<sub>2</sub>O (pD = 5.7).

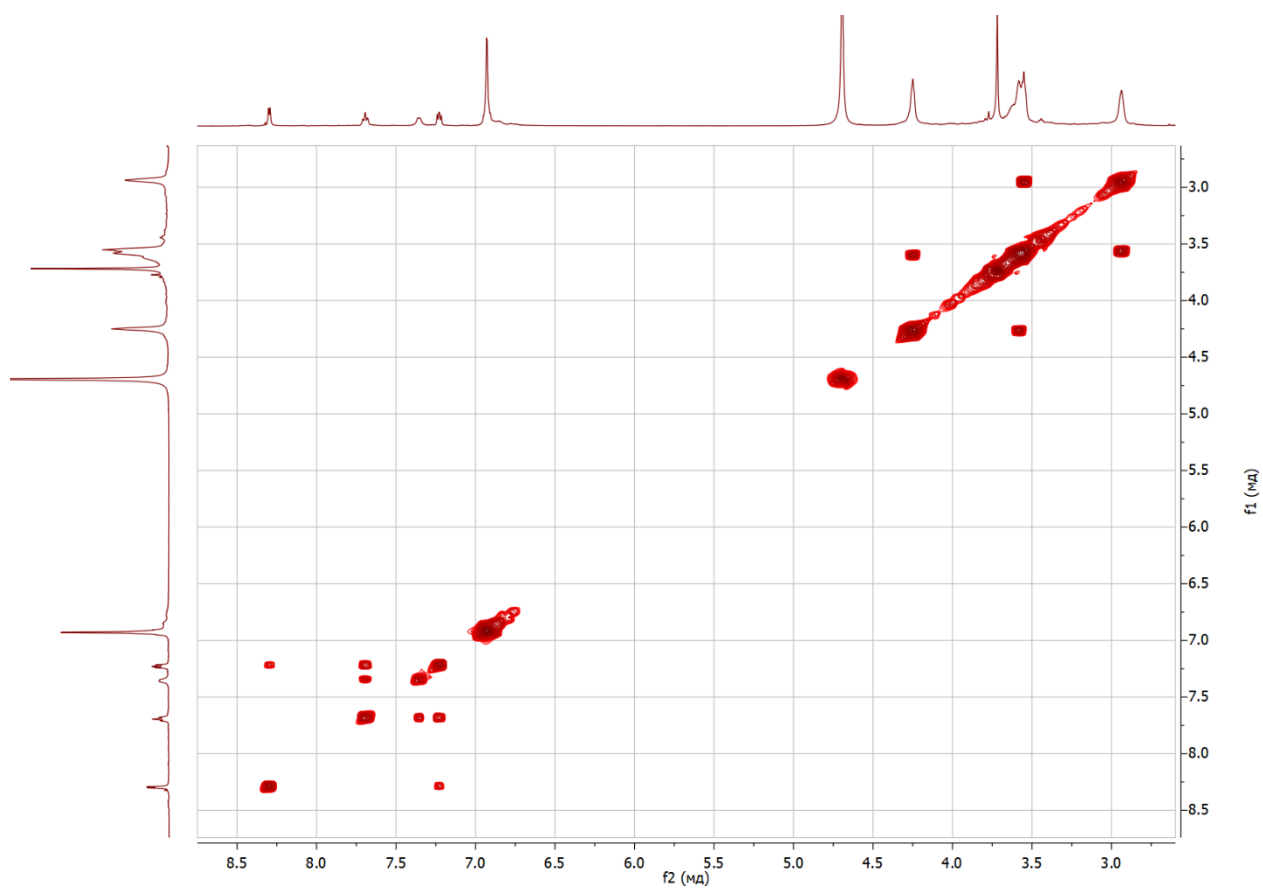

Figure S14. COSY spectrum of  $\text{H}_2\text{BA2A1Py}$  in  $\text{D}_2\text{O}$  ( $\text{pD} = 5.7$ ).

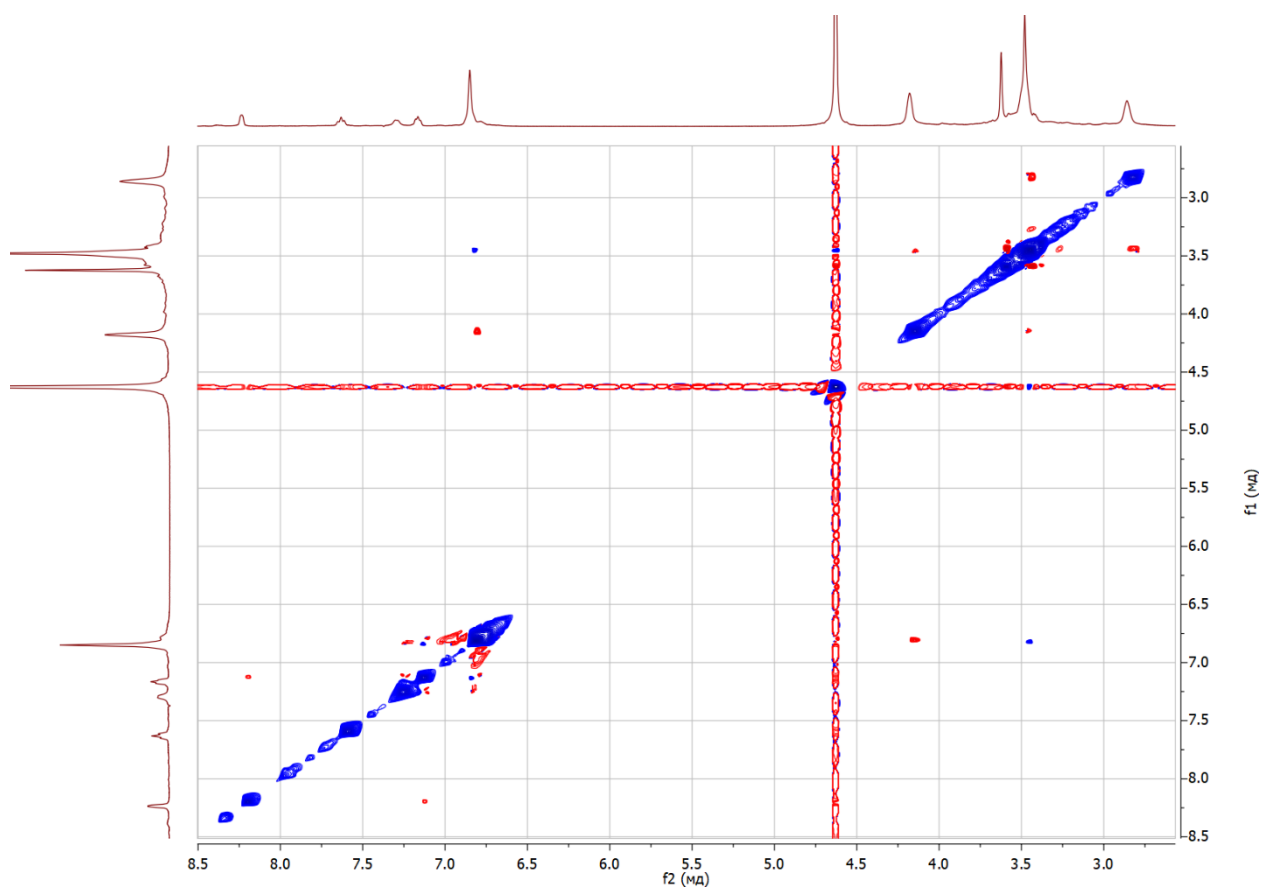

Figure S15. NOESY spectrum of  $\text{H}_2\text{BA2A1Py}$  in  $\text{D}_2\text{O}$  ( $\text{pD} = 5.7$ ).



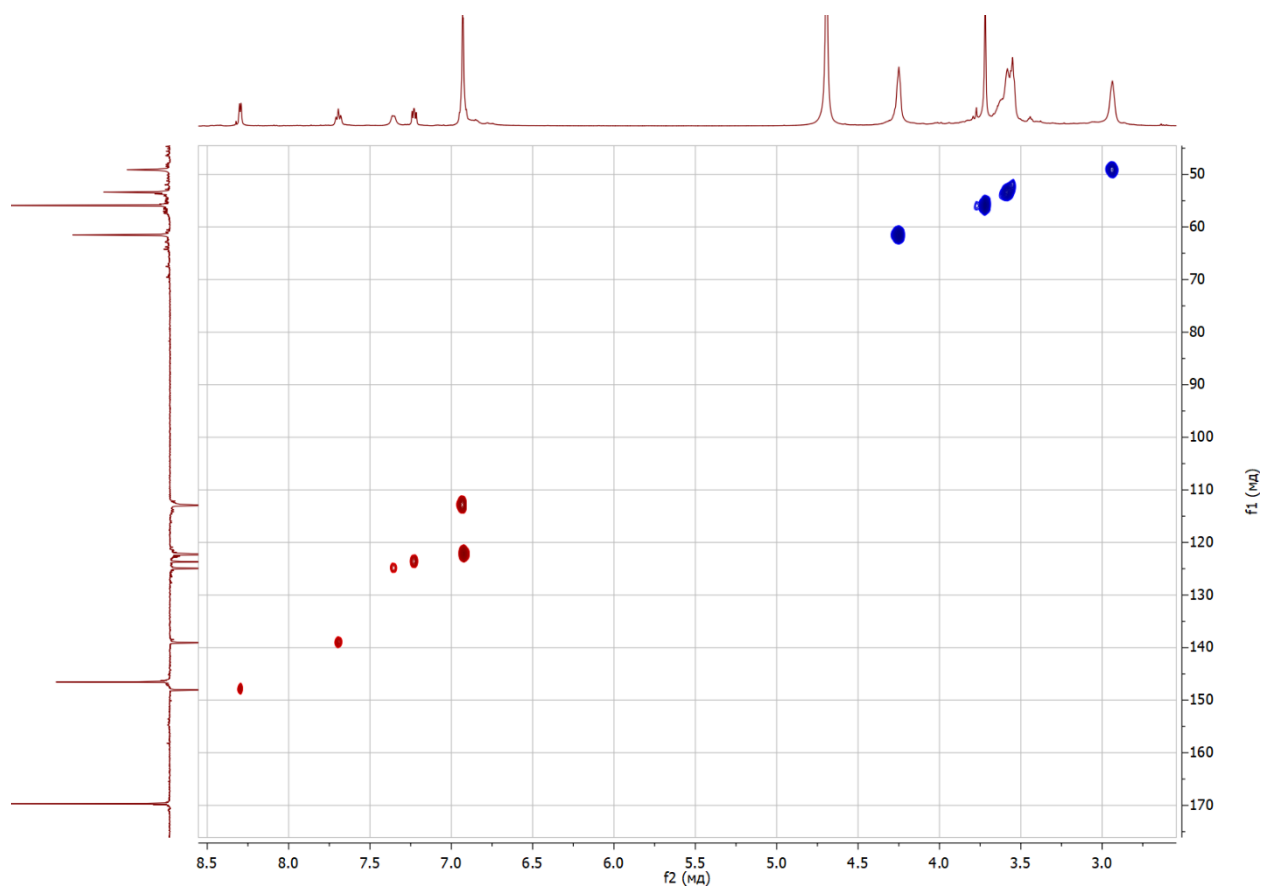

Figure S16. HSQC spectrum of  $\text{H}_2\text{BA2A1Py}$  in  $\text{D}_2\text{O}$  (pD = 5.7).

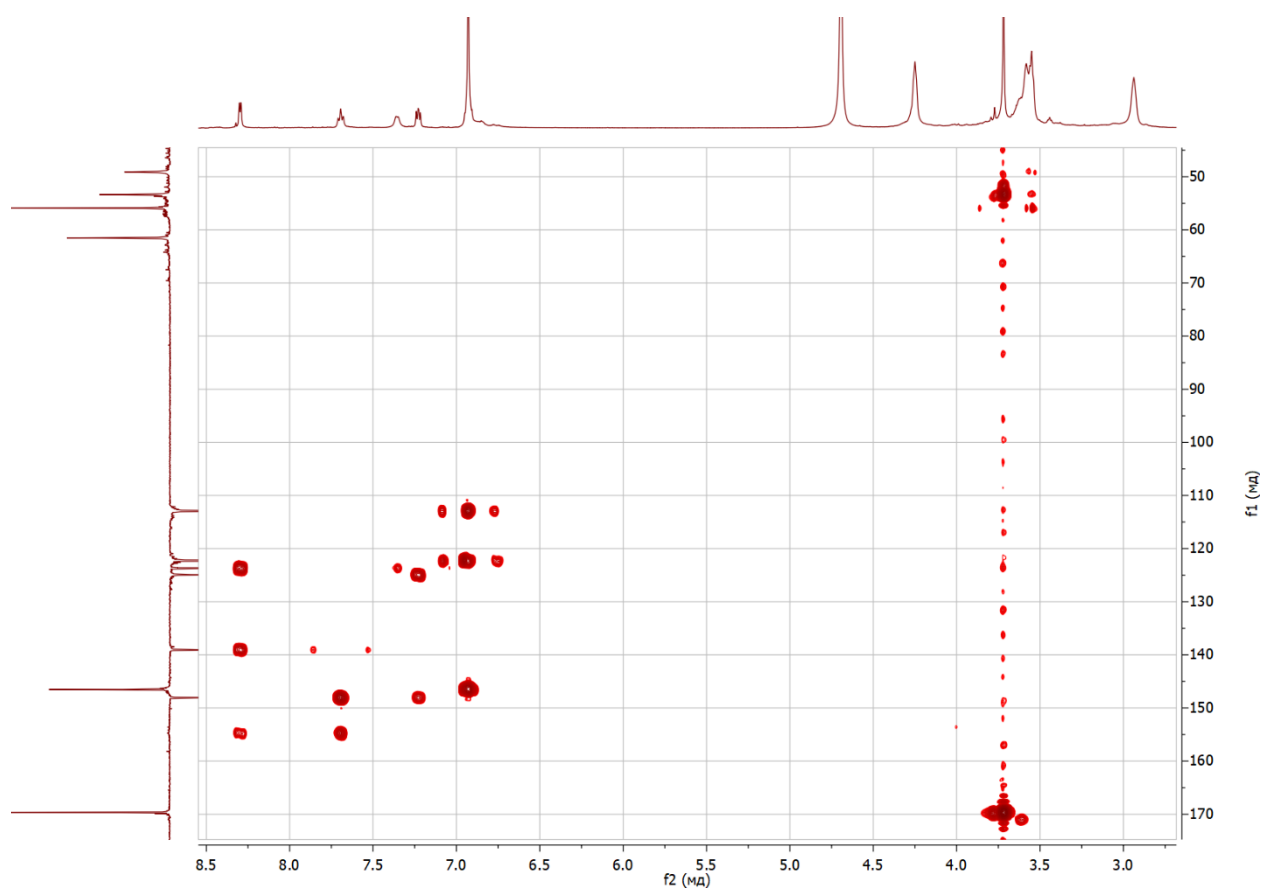

Figure S17. HMBC spectrum of  $\text{H}_2\text{BA2A1Py}$  in  $\text{D}_2\text{O}$  (pD = 5.7).

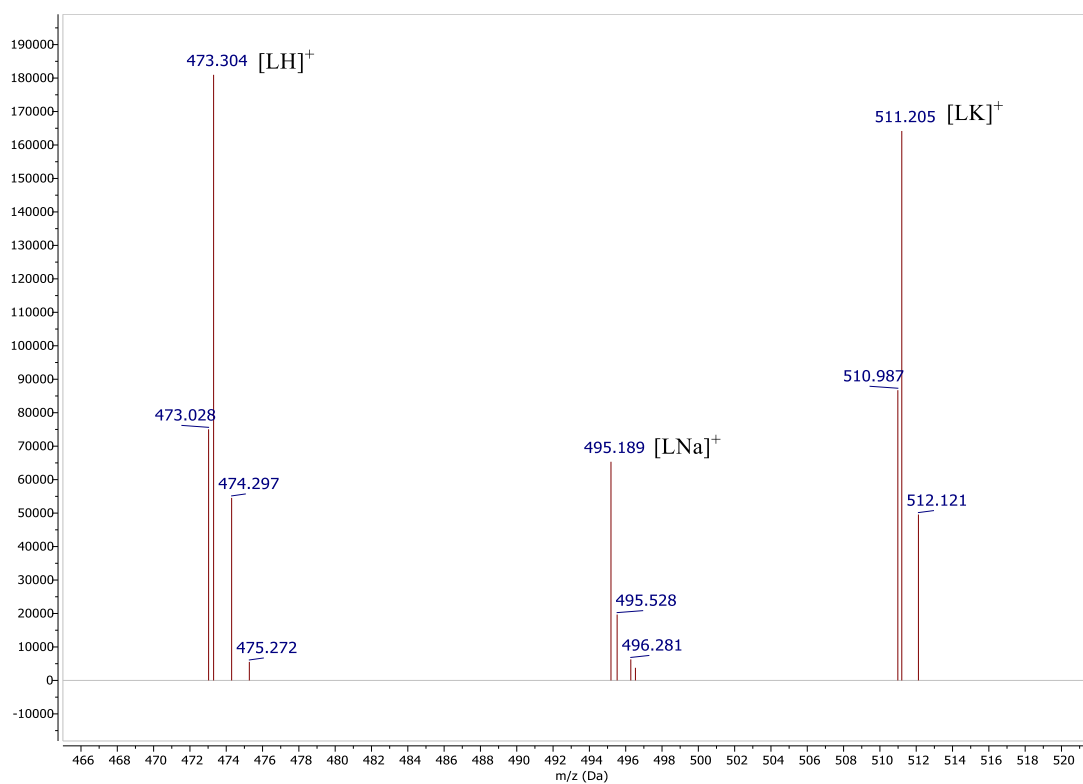

Figure S18. MS (ESI) spectrum of  $\text{H}_2\text{BA2A1Py}$ .

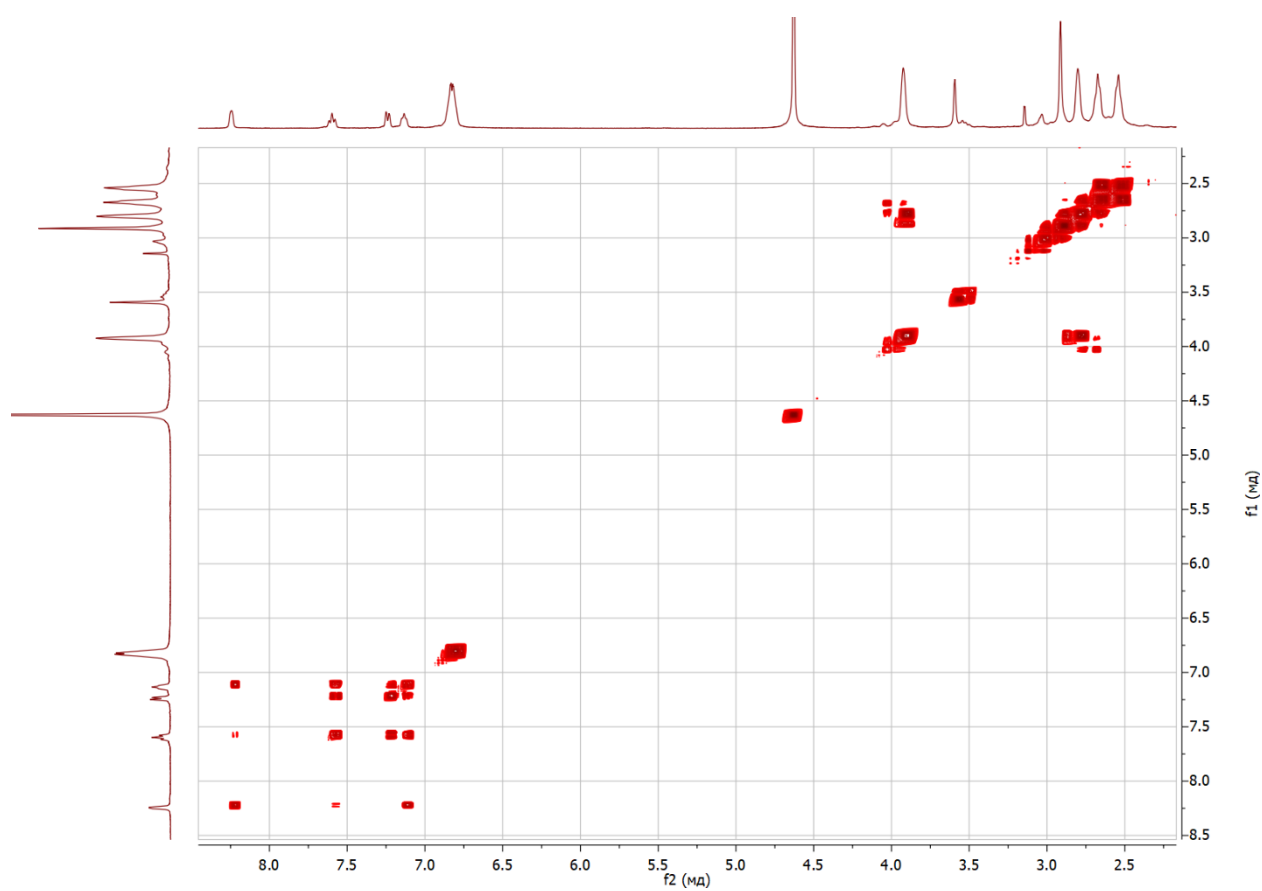

Figure S19. COSY spectrum of  $\text{BA2A1Py}^{2-}$  in  $\text{D}_2\text{O}$  ( $\text{pD} = 11.2$ ).

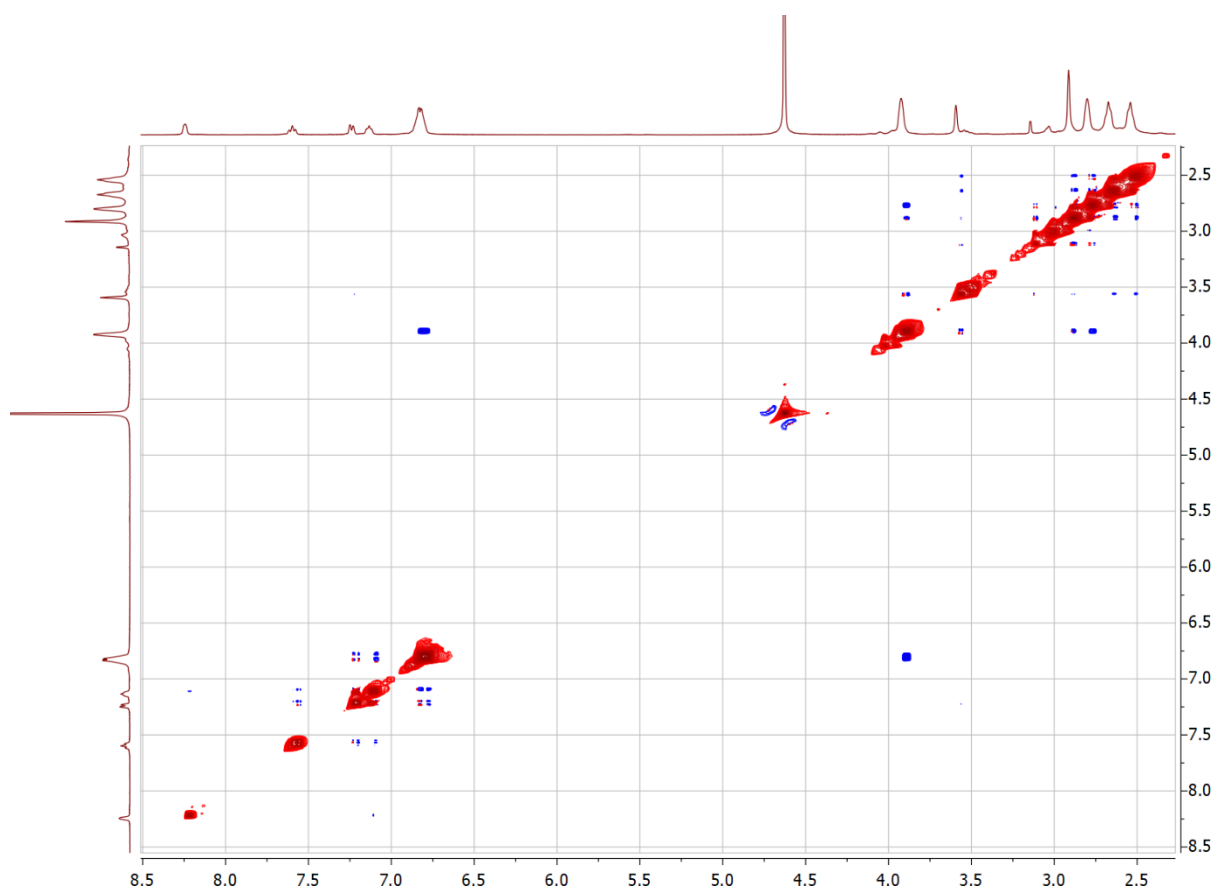

Figure S20. NOESY spectrum of **BA2A1Py**<sup>2-</sup> in D<sub>2</sub>O (pD = 11.2).

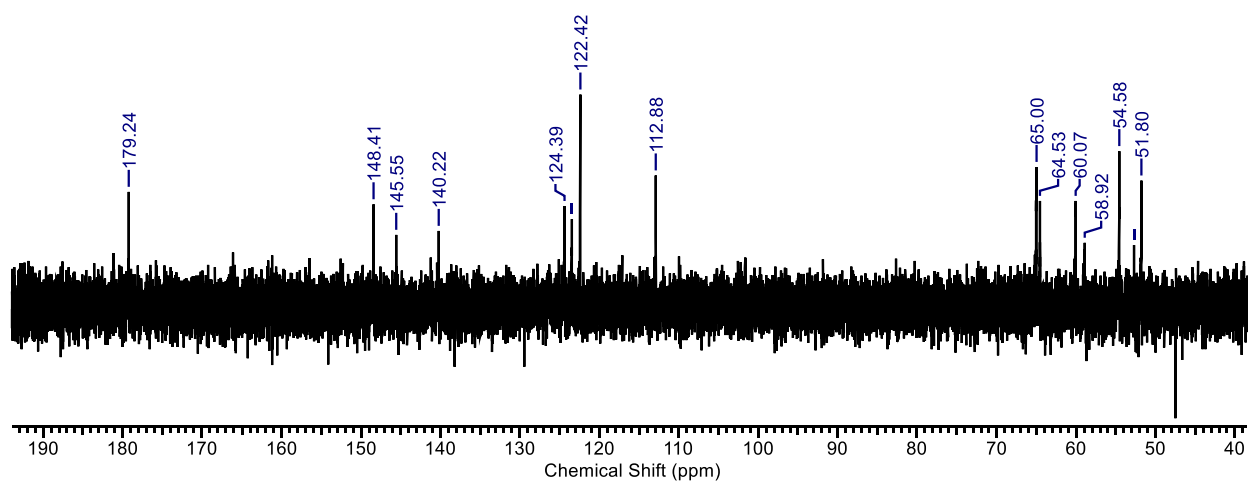

Figure S21. <sup>13</sup>C NMR spectrum of **H<sub>2</sub>BA2A1Py** in the presence of Pb<sup>2+</sup> (C(L) = 10 mM, pD=6.3) in D<sub>2</sub>O.

**Table S1.**  $^1\text{H}$  NMR chemical shifts ( $\Delta\delta$ , ppm) of **H<sub>2</sub>BA2A1Py** recorded in D<sub>2</sub>O solution in the absence and presence of Pb<sup>2+</sup>.

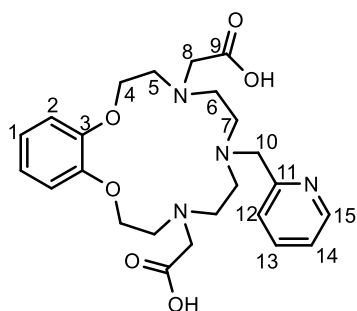

|                 | <b>BA2A1Py<sup>2-</sup></b><br>(pD = 11.2) | <b>HBA2A1Py<sup>-</sup></b><br>(pD = 8.5) | <b>H<sub>2</sub>BA2A1Py</b><br>(pD = 5.7) | <b>H<sub>3</sub>BA2A1Py<sup>+</sup></b><br>(pD = 2.6) | <b>Pb·BA2A1Py</b><br>(pD = 6.3) | <b>Pb·BA2A1PyOH<sup>-</sup></b><br>(pD = 10.5) | <b>Pb·HBA2A1Py<sup>+</sup></b><br>(pD = 2.4) |
|-----------------|--------------------------------------------|-------------------------------------------|-------------------------------------------|-------------------------------------------------------|---------------------------------|------------------------------------------------|----------------------------------------------|
| H <sub>1</sub>  | 6.93                                       | 6.97                                      | 6.99                                      | 7.05                                                  | 7.06                            | 7.06                                           | 7.06                                         |
| H <sub>2</sub>  |                                            | ( $\Delta\delta = 0.04$ )                 | ( $\Delta\delta = 0.06$ )                 | ( $\Delta\delta = 0.12$ )                             | ( $\Delta\delta = 0.13$ )       | ( $\Delta\delta = 0.13$ )                      | ( $\Delta\delta = 0.13$ )                    |
| H <sub>4a</sub> | 4.03                                       | 4.18                                      | 4.31                                      | 4.40                                                  | 4.31                            | 4.31                                           | 4.32                                         |
| H <sub>4e</sub> |                                            | ( $\Delta\delta = 0.15$ )                 | ( $\Delta\delta = 0.28$ )                 | ( $\Delta\delta = 0.37$ )                             | ( $\Delta\delta = 0.28$ )       | ( $\Delta\delta = 0.28$ )                      | ( $\Delta\delta = 0.29$ )                    |
|                 |                                            |                                           |                                           |                                                       | 4.03                            | 4.02                                           | 4.06                                         |
|                 |                                            |                                           |                                           |                                                       | ( $\Delta\delta = 0$ )          | ( $\Delta\delta = -0.01$ )                     | ( $\Delta\delta = 0.03$ )                    |
| H <sub>5a</sub> | 2.91                                       | 3.26                                      | 3.64                                      | 3.70                                                  | 2.73                            | 2.71                                           | 2.80                                         |
| H <sub>5e</sub> |                                            | ( $\Delta\delta = 0.35$ )                 | ( $\Delta\delta = 0.73$ )                 | ( $\Delta\delta = 0.79$ )                             | ( $\Delta\delta = -0.18$ )      | ( $\Delta\delta = -0.20$ )                     | ( $\Delta\delta = -0.11$ )                   |
|                 |                                            |                                           |                                           |                                                       | 3.23                            | 3.20                                           | 3.22                                         |
|                 |                                            |                                           |                                           |                                                       | ( $\Delta\delta = 0.32$ )       | ( $\Delta\delta = 0.29$ )                      | ( $\Delta\delta = 0.31$ )                    |
| H <sub>6a</sub> | 2.78                                       | 3.26                                      | 3.61                                      | 3.68                                                  | 3.11                            | 3.10                                           | 3.13                                         |
| H <sub>6e</sub> |                                            | ( $\Delta\delta = 0.48$ )                 | ( $\Delta\delta = 0.83$ )                 | ( $\Delta\delta = 0.90$ )                             | ( $\Delta\delta = 0.33$ )       | ( $\Delta\delta = 0.32$ )                      | ( $\Delta\delta = 0.35$ )                    |
|                 |                                            |                                           |                                           |                                                       | 2.70                            | 2.71                                           | 2.77                                         |
|                 |                                            |                                           |                                           |                                                       | ( $\Delta\delta = -0.08$ )      | ( $\Delta\delta = -0.07$ )                     | ( $\Delta\delta = -0.01$ )                   |
| H <sub>7a</sub> | 2.64                                       | 3.03                                      | 2.99                                      | 3.09                                                  | 3.05                            | 3.04                                           | 3.09                                         |
| H <sub>7e</sub> |                                            | ( $\Delta\delta = 0.39$ )                 | ( $\Delta\delta = 0.35$ )                 | ( $\Delta\delta = 0.45$ )                             | ( $\Delta\delta = 0.41$ )       | ( $\Delta\delta = 0.40$ )                      | ( $\Delta\delta = 0.45$ )                    |
|                 |                                            |                                           |                                           |                                                       | 2.54                            | 2.54                                           | 2.63                                         |
|                 |                                            |                                           |                                           |                                                       | ( $\Delta\delta = -0.10$ )      | ( $\Delta\delta = -0.10$ )                     | ( $\Delta\delta = -0.01$ )                   |
| H <sub>8x</sub> | 3.02                                       | 3.36                                      | 3.77                                      | 3.83                                                  | 3.70                            | 3.69                                           | 3.74                                         |
| H <sub>8y</sub> |                                            | ( $\Delta\delta = 0.34$ )                 | ( $\Delta\delta = 0.75$ )                 | ( $\Delta\delta = 0.81$ )                             | ( $\Delta\delta = 0.68$ )       | ( $\Delta\delta = 0.67$ )                      | ( $\Delta\delta = 0.72$ )                    |
|                 |                                            |                                           |                                           |                                                       | 2.27                            | 2.25                                           | 2.44                                         |
|                 |                                            |                                           |                                           |                                                       | ( $\Delta\delta = -0.75$ )      | ( $\Delta\delta = -0.77$ )                     | ( $\Delta\delta = -0.58$ )                   |
| H <sub>10</sub> | 3.70                                       | 3.92                                      | 3.68                                      | 4.12                                                  | 4.57                            | 4.56                                           | 4.60                                         |
|                 |                                            | ( $\Delta\delta = 0.22$ )                 | ( $\Delta\delta = -0.02$ )                | ( $\Delta\delta = 0.42$ )                             | ( $\Delta\delta = 0.87$ )       | ( $\Delta\delta = 0.86$ )                      | ( $\Delta\delta = 0.90$ )                    |
| H <sub>12</sub> | 7.34                                       | 7.41                                      | 7.41                                      | 8.05                                                  | 7.53                            | 7.53                                           | 7.56                                         |
|                 |                                            | ( $\Delta\delta = 0.07$ )                 | ( $\Delta\delta = 0.07$ )                 | ( $\Delta\delta = 0.71$ )                             | ( $\Delta\delta = 0.19$ )       | ( $\Delta\delta = 0.19$ )                      | ( $\Delta\delta = 0.22$ )                    |
| H <sub>13</sub> | 7.71                                       | 7.70                                      | 7.75                                      | 8.44                                                  | 7.97                            | 7.97                                           | 8.00                                         |
|                 |                                            | ( $\Delta\delta = -0.01$ )                | ( $\Delta\delta = 0.04$ )                 | ( $\Delta\delta = 0.73$ )                             | ( $\Delta\delta = 0.26$ )       | ( $\Delta\delta = 0.26$ )                      | ( $\Delta\delta = 0.29$ )                    |
| H <sub>14</sub> | 7.24                                       | 7.28                                      | 7.29                                      | 7.90                                                  | 7.47                            | 7.47                                           | 7.51                                         |
|                 |                                            | ( $\Delta\delta = 0.04$ )                 | ( $\Delta\delta = 0.05$ )                 | ( $\Delta\delta = 0.66$ )                             | ( $\Delta\delta = 0.23$ )       | ( $\Delta\delta = 0.23$ )                      | ( $\Delta\delta = 0.27$ )                    |
| H <sub>15</sub> | 8.35                                       | 8.36                                      | 8.35                                      | 8.62                                                  | 8.38                            | 8.33                                           | 8.41                                         |
|                 |                                            | ( $\Delta\delta = 0.01$ )                 | ( $\Delta\delta = 0$ )                    | ( $\Delta\delta = 0.27$ )                             | ( $\Delta\delta = 0.03$ )       | ( $\Delta\delta = -0.02$ )                     | ( $\Delta\delta = 0.06$ )                    |

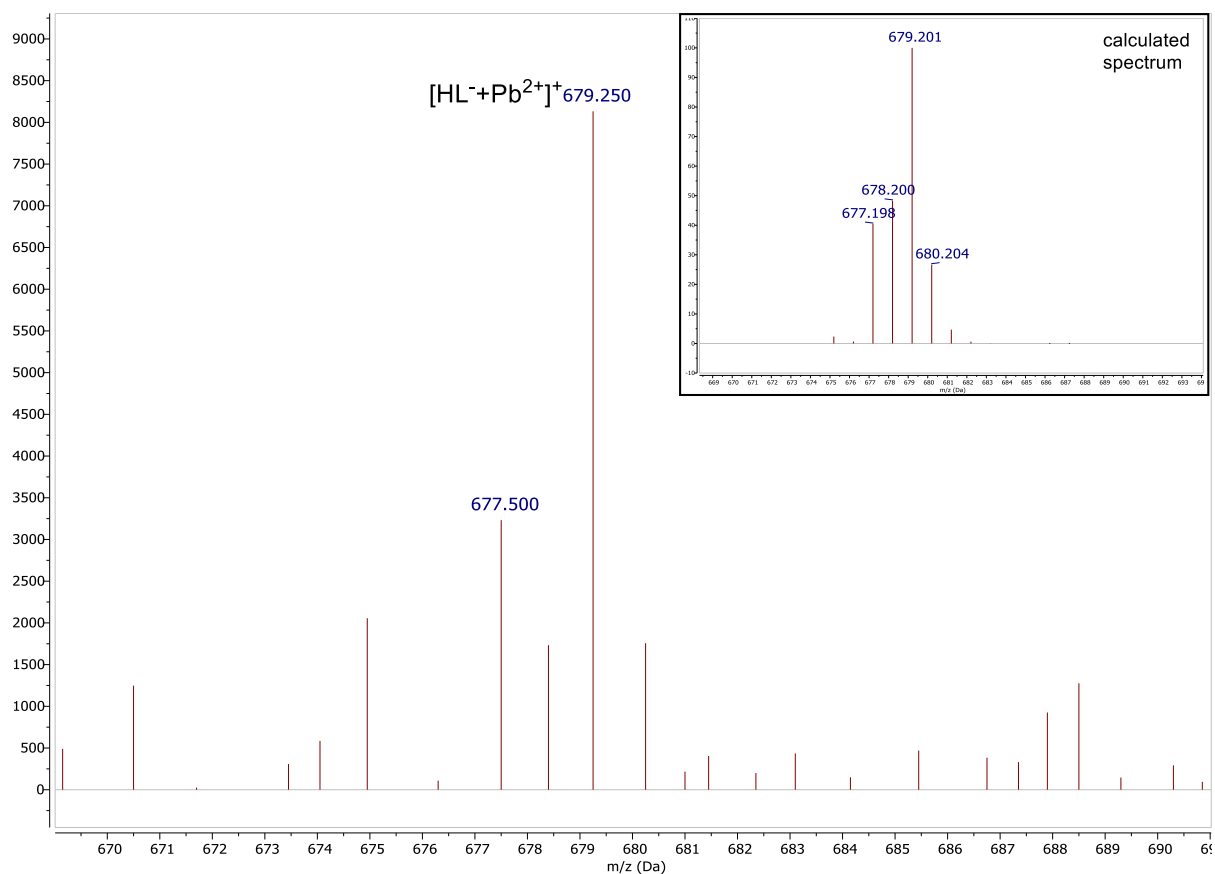

Figure S22. MS (ESI) spectrum of  $\text{H}_2\text{BA2A1Py}$  in the presence of  $\text{Pb}^{2+}$  in water.

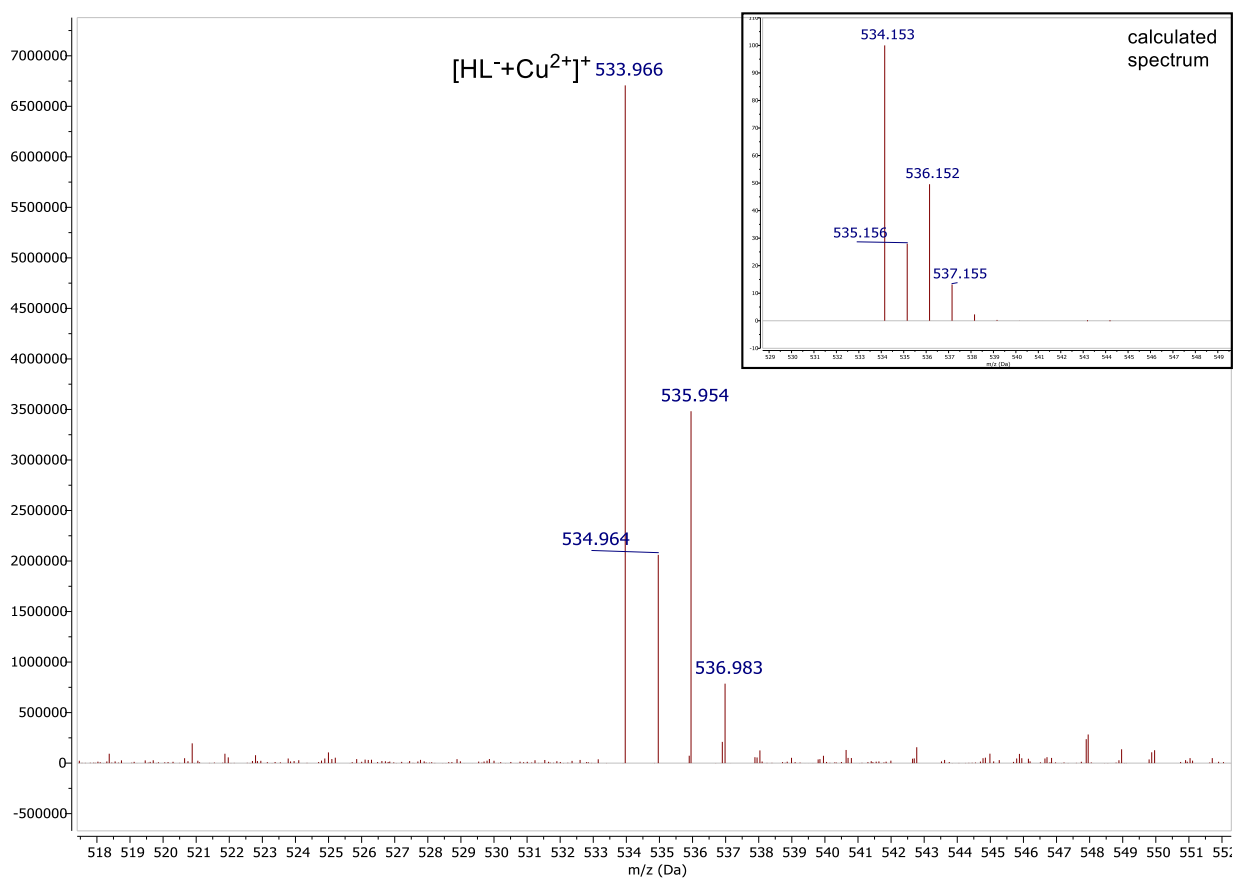

Figure S23. MS (ESI) spectrum of  $\text{H}_2\text{BA2A1Py}$  in the presence of  $\text{Cu}^{2+}$  in water.

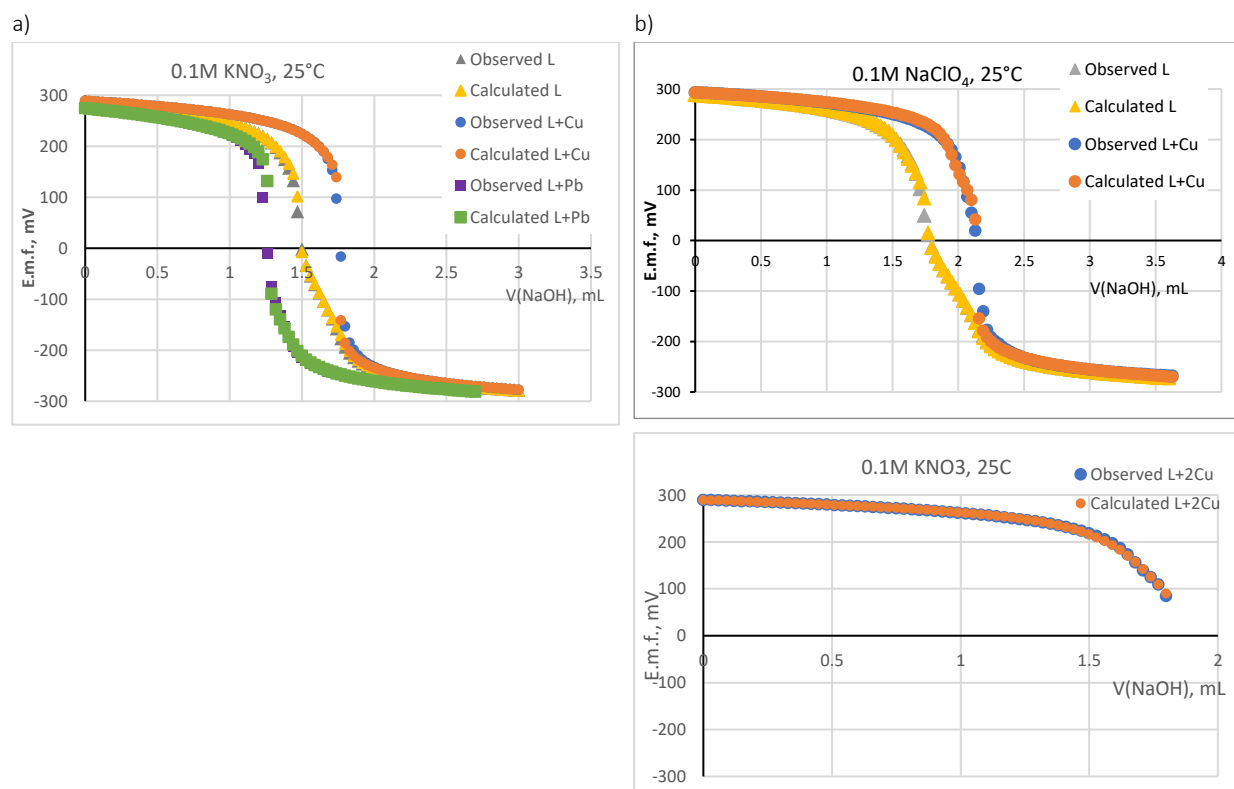

**Figure S24.** Potentiometric titration curves of solutions, containing 1 mM of L and 1 mM of L with 1 mM of  $M^{2+}$  in 0.1 M  $KNO_3$  (a) 0.1M  $NaClO_4$  (b) and 1 mM of L with 2 mM of  $Cu^{2+}$  in 0.1 M  $KNO_3$ .

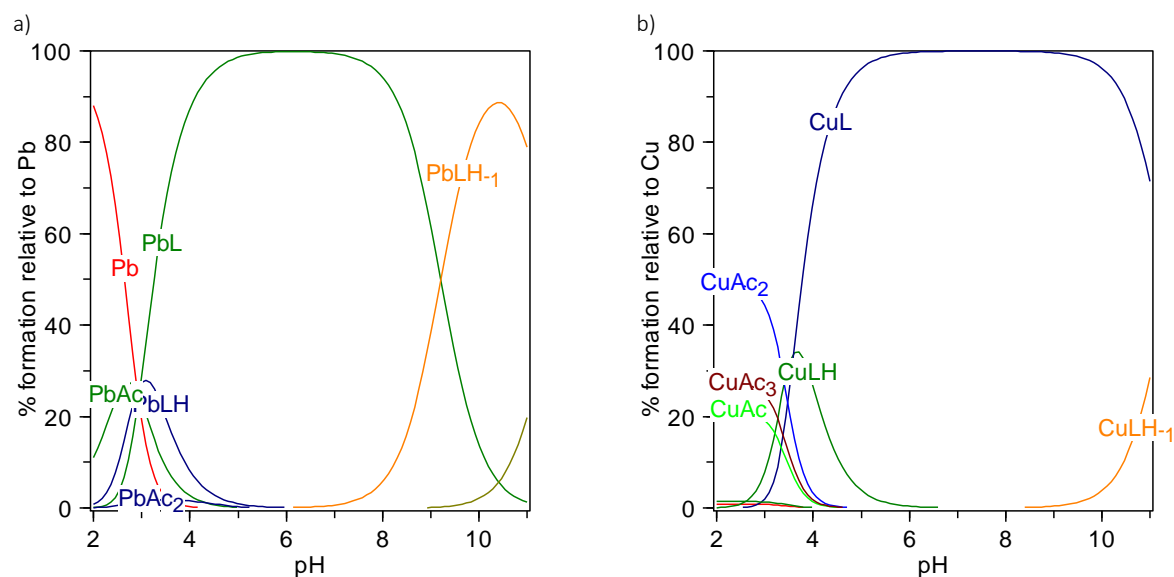

**Figure S25.** Species distribution diagrams in the systems: a)  $Pb^{2+}$  (10 nM),  $H_2BA2A1Py$  (0.1 mM),  $Ac^-$  (0.15 M); b)  $Cu^{2+}$  (10 nM),  $H_2BA2A1Py$  (0.1 mM),  $Ac^-$  (0.15 M).

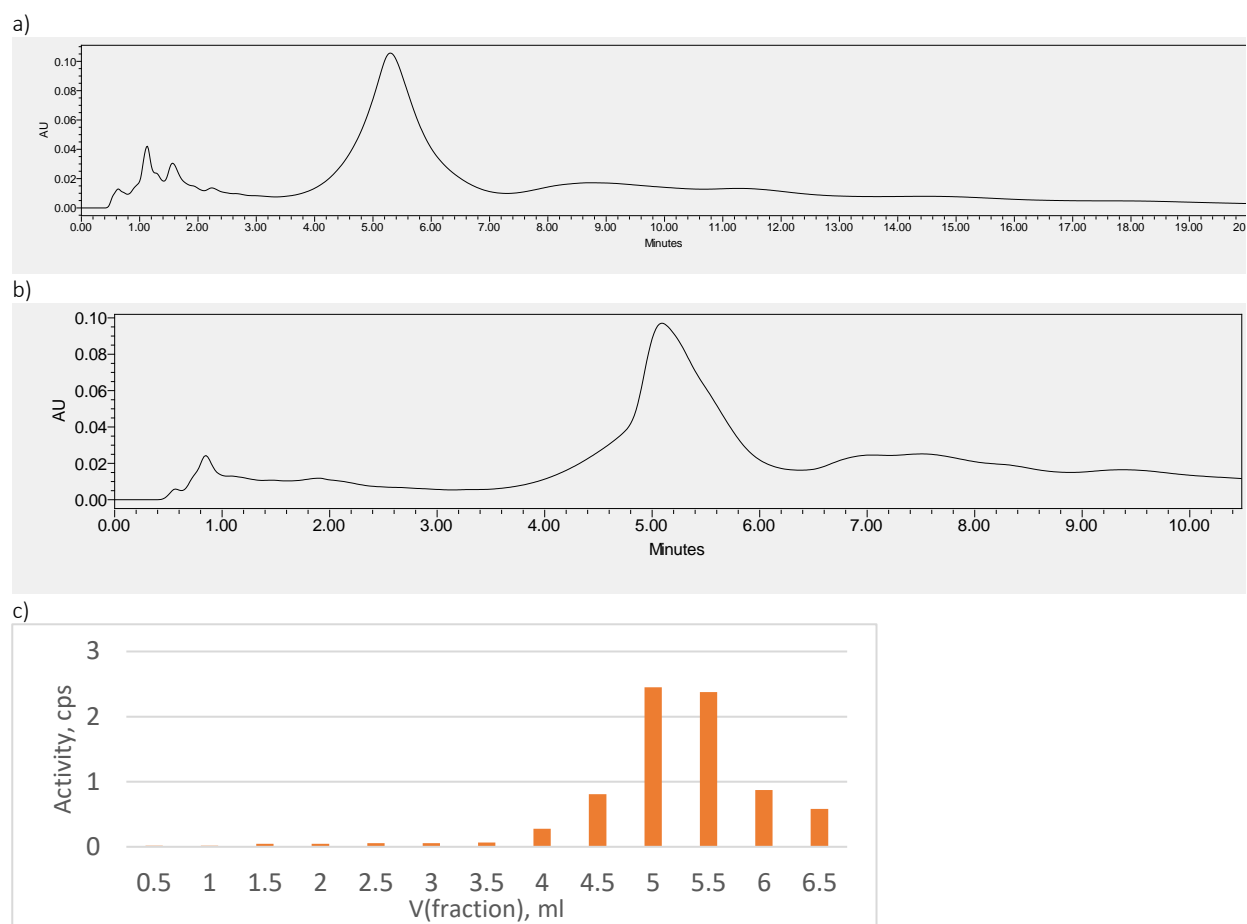

**Figure S26.** Chromatograms of: a) Cu-BA2A1Py (non-radioactive, 1.7 mM, pH5.3) recorded by UV-Vis detector at 267 nm; b) Pb-BA2A1Py (non-radioactive, 2 mM, pH7.4) recorded by UV-Vis detector at 267 nm; c) [ $^{210}\text{Pb}$ ]Pb-BA2A1Py (radioactive,  $c(\text{L}) = 0.1\text{mM}$ , pH5.3, without NaOAc) plotted according to measured activity in the collected fractions (correction to dead volume was applied).

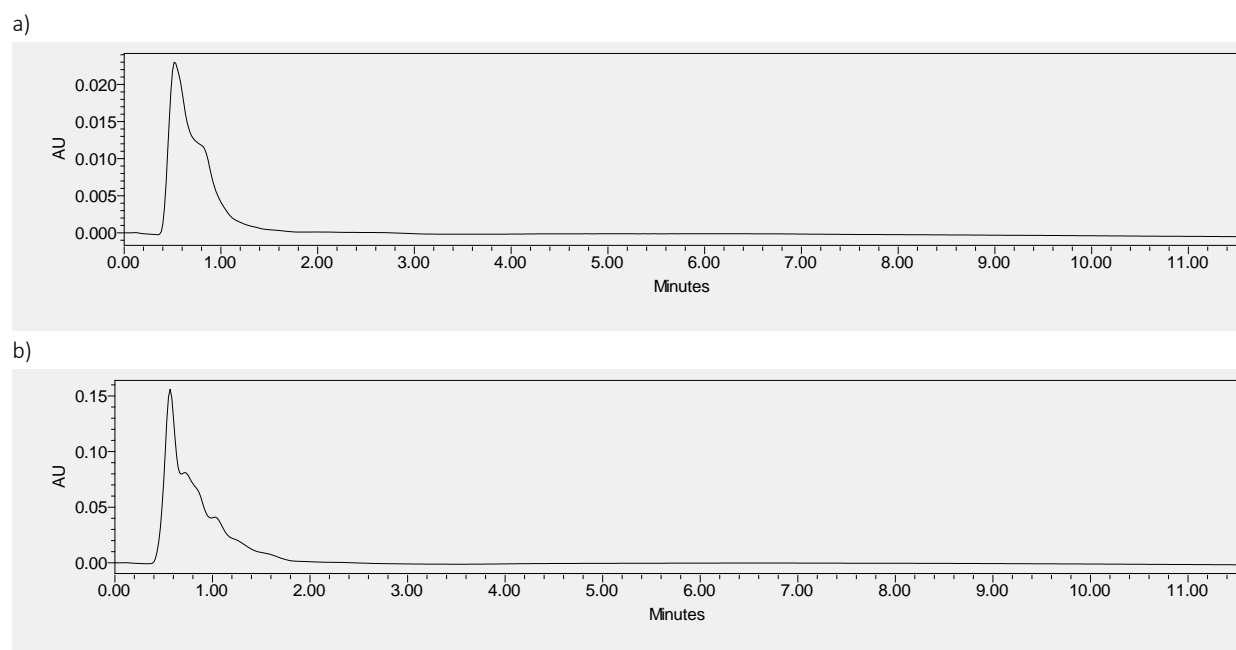

**Figure S27.** Chromatogram of AcONa (0.15M) recorded by UV-Vis detector at 221 nm (a) and 267 nm (b), in the mode used for Pb-BA2A1Py complex (isocratic,  $\text{H}_2\text{O} - 0.9$ ,  $\text{CH}_3\text{CN} - 0.1$ ).
